# Supplementary material for: Retention Time Variability as a Mechanism for Animal Mediated Long-Distance Dispersal
Source: PubMed Central journal article supplement (PMC3237446; doi:10.1371/journal.pone.0028447), 2011-12-14
Supplement: pone.0028447.s001.pdf [file pone.0028447.s001.pdf]

## Text S1: Summary statistics of the seed dispersal kernel

Here, we present an analytical method to connect the moments of a seed dispersal kernel ( $P_s$ ) with the time-dependent moments of an animal movement pattern ( $P_m$ ) and the distribution of seed retention time ( $P_r$ ).

Suppose that  $\Omega \in \mathbf{R}^d$ , where  $d \in \{1, 2\}$  is the number of spatial dimensions. In general, the mean, variance, and “excess” kurtosis of  $P_s(\mathbf{x})$  in the  $x_i$ -direction ( $i = 1, 2$ ) are defined to be

$$\begin{aligned}\mu_{si} &= \int_{\Omega} x_i P_s(\mathbf{x}) d\mathbf{x} \\ \sigma_{si}^2 &= \int_{\Omega} (x_i - \mu_{si})^2 P_s(\mathbf{x}) d\mathbf{x} \\ \kappa_{si} &= \frac{1}{(\sigma_{si})^4} \int_{\Omega} (x_i - \mu_{si})^4 P_s(\mathbf{x}) d\mathbf{x} - 3\end{aligned}\tag{1}$$

The constant 3 that appears in the equation for  $\kappa_{si}$  is present so that if  $P_s$  is Gaussian in the  $x_i$ -direction then  $\kappa_{si} = 0$  or, in other words, it is a measurement relative to that of a Gaussian kernel. When  $d = 2$ , the covariance of  $P_s$  in the two directions  $x_1$  and  $x_2$  is defined to be

$$\sigma_{s12} = \int_{\Omega} (x_1 - \mu_{s1})(x_2 - \mu_{s2}) P_s(\mathbf{x}) d\mathbf{x}\tag{2}$$

By expanding the polynomials that appear in the different integrands, all summary statistics can be expressed as summation of the moments  $\int_{\Omega} x_i^m x_j^n P_s(\mathbf{x}) d\mathbf{x}$  of  $P_s$  with appropriate coefficients. For example, if we expand the integrand of Eq (2) we obtain

$$\sigma_{s12} = \int_{\Omega} (x_1 x_2 - \mu_{s1} x_2 - \mu_{s2} x_1 + \mu_{s1} \mu_{s2}) P_s(\mathbf{x}) d\mathbf{x}\tag{3}$$

where the first term on the right hand side is a moment term with  $(m = 1, n = 1)$ , the second with  $(m = 0, n = 1)$ , the third with  $(m = 1, n = 0)$  and the last term with  $(m = 0, n = 0)$ . Likewise, other summary statistics can also be written as combinations of different moment terms.

In general, the  $(m, n)$ th moment of  $P_s$  can be found by substituting Eq (1\*) (the asterisk symbol \* denotes main text) into the preceding moment formula and then changing the order of integration,

$$\int_{\Omega} x_i^m x_j^n P_s(\mathbf{x}) d\mathbf{x} = \int_0^{\infty} \left( \int_{\Omega} x_i^m x_j^n P_m(\mathbf{x}, t) d\mathbf{x} \right) P_r(t) dt$$

Denoting the  $(m, n)$ th moment of a distribution  $P_{\bullet}$  by  $\mu_{\bullet ij}^{mn}$ , we obtain the following important relation between the moments of  $P_s$  and  $P_m$ ,

$$\mu_{sij}^{mn} = \int_0^{\infty} \mu_{mij}^{mn}(t) P_r(t) dt\tag{4}$$

Thus, the moments of  $P_s$  can always be computed provided that  $P_r$  and the (time-dependent) moments of  $P_m$  are known. It is not necessary to know  $P_m$  in full.

For notational simplicity we will write  $\mu_{\bullet ij}^{mn}$  as  $\mu_{\bullet}^m$  when  $d = 1$ , and we will write it as  $\mu_{\bullet i}^m$  or  $\mu_{\bullet j}^n$  when  $d = 2$  and  $mn = 0$ . In the latter case, we will omit the remaining superscript if it is equal to 1.
