# Supplementary material for: Retention Time Variability as a Mechanism for Animal Mediated Long-Distance Dispersal
Source: PubMed Central journal article supplement (PMC3237446; doi:10.1371/journal.pone.0028447), 2011-12-14
Supplement: pone.0028447.s003.pdf [file pone.0028447.s003.pdf]

### Text S3: Diffusive movement in two dimensions

Suppose animals perform random walks in  $\Omega = \mathbf{R}^2$  (*i.e.*, two dimensions) and let  $P_m(x_1, x_2, t)$  be the probability density of an animal being at location  $\mathbf{x} = (x_1, x_2) \in \Omega$  at time  $t \geq 0$ . The initial value problem that determines the evolution of  $P_m$  is now [1]

$$\frac{\partial}{\partial t} P_m = D \left( \frac{\partial^2}{\partial x_1^2} + \frac{\partial^2}{\partial x_2^2} \right) P_m, \quad P_m(x_1, x_2, 0) = \delta(x_1)\delta(x_2) \quad (1)$$

and its solution is

$$P_m(x_1, x_2, t) = \frac{1}{4\pi Dt} \exp \left( -\frac{x_1^2 + x_2^2}{4Dt} \right), \quad (x_1, x_2) \in \Omega \text{ and } t > 0 \quad (2)$$

The graph of this function is a 2-D Gaussian that expands because of diffusion.

**Mean of  $P_s$ :** It follows from Eq (4) of Text S1 and the fact that  $P_m$  is an even function of  $x_i$  that

$$\mu_{si} = \int_0^\infty \mu_{mi}(t) P_r(t) dt = \int_0^\infty \left( \int_{-\infty}^\infty \left( \int_{-\infty}^\infty x_i P_m dx_i \right) dx_j \right) P_r(t) dt = 0 \quad (3)$$

**Scale of  $P_s$ :** Substituting Eqs (2), (3), and (1\*) into Eq (??) we obtain

$$\sigma_{si}^2 = \int_0^\infty \left( \int_{-\infty}^\infty \int_{-\infty}^\infty x_i^2 P_m dx_1 dx_2 \right) P_r(t) dt = \int_0^\infty (2Dt) P_r(t) dt = 2D\mu_r \quad (4)$$

We define the *total scale* of  $P_s$  to be

$$\sigma_s^2 = \sum_{i=1}^2 \sigma_{si}^2 = 4D\mu_r$$

**Shape and total kurtosis of  $P_s$ :** Substituting Eqs (2), (3), (4), and (1\*) into Eq (1) of Text S1 produces (see Text S2 for similar algebraic steps)

$$\kappa_{si} = \frac{1}{\sigma_{si}^4} \int_{-\infty}^\infty \int_{-\infty}^\infty x_i^4 P_s dx_1 dx_2 - 3 = \frac{3\sigma_r^2}{\mu_r^2}$$

We define the *total kurtosis* of  $P_s$  to be

$$\kappa_s = \sum_{i=1}^2 \kappa_{si} = \frac{6\sigma_r^2}{\mu_r^2}$$

**Covariance of  $P_s$ :** As  $P_m$  is constant for fixed  $x_1^2 + x_2^2$ , the covariance of  $P_s$  is

$$\sigma_{s12} = \int_0^\infty \left( \int_{-\infty}^\infty \int_{-\infty}^\infty x_i x_j P_m dx_1 dx_2 \right) P_r(t) dt = \int_{-\infty}^\infty 0 \cdot P_r(t) dt = 0$$

Note that, until here, we have not made any assumptions on the full form of  $P_r$ . Therefore, as in for the one dimensional case, the above results are generally applicable to any retention time pattern for a diffusively moving organism in two dimensions.

**Form of  $P_s$**  To find an expression for  $P_s$ , we substitute Eqs (2) and (3\*) into Eq (1\*) to obtain [2],

$$P_s(x_1, x_2) = \frac{A_0}{x_c^{a+1}} x^{a-1} K_{a-1} \left( \frac{x}{x_c} \right), \quad (x_1, x_2) \in \Omega$$

Here,  $A_0$  is a positive constant (depending only on  $a$ ),  $x_c = \sqrt{bD}$ , and  $x = \sqrt{x_1^2 + x_2^2}$ . At large distances, we have the approximation

$$P_s(x) \approx \frac{B_0}{x_c^{a+\frac{1}{2}}} x^{a-\frac{3}{2}} e^{-\frac{x}{x_c}}, \quad x \gg x_c$$

As in one dimensional case of Eqs (6\*) and (7\*),  $P_s$  exhibits power-law with an exponential cut-off.

## References

- [1] Okubo A, Levin SA (2001) *Diffusion and ecological problems: modern perspectives*. New York: Springer-Verlag.
- [2] Wolfram Research Inc (2004) *Mathematica*, Version 5.2. Champaign, IL: Wolfram Research, Inc.
