# Supplementary material for: Retention Time Variability as a Mechanism for Animal Mediated Long-Distance Dispersal
Source: PubMed Central journal article supplement (PMC3237446; doi:10.1371/journal.pone.0028447), 2011-12-14
Supplement: pone.0028447.s004.pdf [file pone.0028447.s004.pdf]

### Text S4: Diffusive movement in two dimensions with drift

Suppose animals perform random walks with drift in  $\Omega = \mathbf{R}^2$  and let  $P_m(x_1, x_2, t)$  be the probability density of an animal being at location  $\mathbf{x} = (x_1, x_2) \in \Omega$  at time  $t \geq 0$ . The initial value problem that determines the evolution of  $P_m$  is now an advection-diffusion equation [1]

$$\frac{\partial}{\partial t} P_m = D \left( \frac{\partial^2}{\partial x_1^2} + \frac{\partial^2}{\partial x_2^2} \right) P_m - \left( v_1 \frac{\partial}{\partial x_1} + v_2 \frac{\partial}{\partial x_2} \right) P_m, \quad P_m(x_1, x_2, 0) = \delta(x_1) \delta(x_2)$$

Here,  $v_i$  is the net velocity of animals in the  $x_i$ -direction. A drift can result for a variety of reasons, including the presence of wind or water, an animal's migratory behavior, or the influence of an elevational gradient. Depending on the relative magnitude of the diffusion rate  $D$  and the advection/drift terms ( $v_1$  and  $v_2$ ), the movement can be dominated by random motion, directed motion, or both. The solution of the equation above is

$$P_m(x_1, x_2, t) = \frac{1}{4\pi Dt} \exp \left( - \frac{(x_1 - v_1 t)^2 + (x_2 - v_2 t)^2}{4Dt} \right), \quad (x_1, x_2) \in \Omega \text{ and } t > 0 \quad (1)$$

The graph of this function is a 2-D Gaussian that expands because of diffusion and whose center moves in the direction  $(v_1, v_2)$  with speed  $v = \sqrt{v_1^2 + v_2^2}$ .

**Mean, scale, shape, and covariance of  $P_s$ :** It can be shown using arguments similar to those used before that

$$\mu_{si} = v_i \mu_r, \quad \sigma_{si}^2 = 2D\mu_r + v_i^2 \sigma_r^2 \quad \text{and} \quad \kappa_{si} = \frac{6\sigma_r^2}{\mu_r^2} \left\{ 1 - 2 \left( 2 + \frac{v_i^2 \sigma_r^2}{D\mu_r} \right)^{-2} \right\}$$

Furthermore, the covariance of  $P_s$  is  $v_1 v_2 \sigma_r^2$ . Here, as in one and two dimensional cases, we have not yet made any assumptions on the full form of  $P_r$ . Therefore, the above results on moments of seed dispersal kernel are generally applicable to organisms moving via diffusion with drift with any retention time pattern ( $P_r$ ).

**Form of  $P_s$ :** To find an expression for  $P_s$ , we substitute Eqs (1) and (3\*) into Eq (1\*) to obtain [2],

$$P_s(x_1, x_2) = \frac{A_0}{x_c} \left( \frac{x_c}{bD} \right)^a x^{a-1} \exp \left( \frac{x_1 v_1 + x_2 v_2}{2D} \right) K_{a-1} \left( \frac{x}{x_c} \right)$$

Here,  $A_0$  is a positive constant (depending only on  $a$ ),  $x_c = \left( \frac{4bD^2}{4D+bv^2} \right)^{\frac{1}{2}}$ , and  $x = \sqrt{x_1^2 + x_2^2}$ . In a polar direction  $\theta$  (where the angle is taken with respect to the direction of the drift), we approximate  $P_s$  at large distances by

$$P_s(x, \theta) \approx \frac{B_0}{x_c} \left( \frac{x_c}{bD} \right)^a x^{a-\frac{3}{2}} \exp \left( -x \left\{ \frac{1}{x_c} - \frac{v \cos \theta}{2D} \right\} \right), \quad x \gg x_c$$

Therefore, we conclude that  $P_s$  exhibits power-law with an exponential cut-off. It is easy to see that the cut-off distance  $x_c$  can be no larger than  $\max\{\sqrt{bD}, \frac{2D}{v}\}$ , and that it approaches one of these values as the corresponding mode of transport becomes dominant. That is, if random motion dominates ( $bv^2 \ll 4D$ ) then  $x_c \approx \sqrt{bD}$  and if directed motion dominates ( $bv^2 \gg 4D$ ) then  $x_c \approx \frac{2D}{v}$ . See Fig S(1) for features of  $P_s$  for different values of variations in seed retention times ( $\sigma_r^2$ ), which is qualitatively similar previous random walk models without drift (Figure 3\*(a-b)).

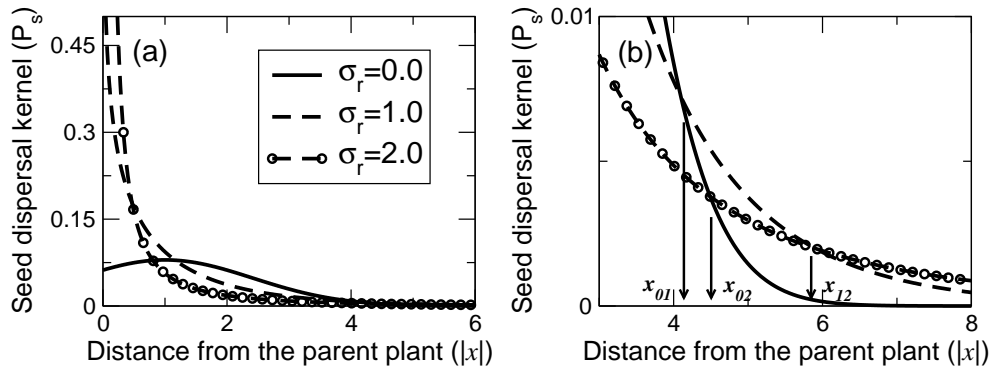

**Figure S1:** Diffusion with drift in two dimensions. (a) The seed dispersal kernel as a function of distance from the source tree ( $|x|$ ) and standard deviation in seed retention time ( $\sigma_r$ ). The case  $\sigma_r = 0$  corresponds to a Gaussian kernel. (b) The seed dispersal kernel at larger distances. The symbol  $x_{ij}$  (*e.g.*,  $x_{01}$ ) indicates the distance at which a seed dispersal kernel with  $\sigma_r = j$  (*e.g.*,  $\sigma_r = 1$ ) begins to have more long distance dispersal events than a seed dispersal kernel with  $\sigma_r = i$  (*e.g.*,  $\sigma_r = 0$ ). Note that  $x_{01} < x_{02} < x_{12}$  ( $x_{01} \approx 4.1$ ,  $x_{02} \approx 4.3$ ,  $x_{12} \approx 5.9$ ). Parameters:  $D = 1.0$ ,  $\mu_r = 1.0$ ,  $v_1 = 1$ , and  $v_2 = 0$ .

## References

- [1] Okubo A (1986) Dynamical aspects of animal grouping: swarms, schools, flocks, and herds. *Adv Biophys* 22: 1.
- [2] Wolfram Research Inc (2004) *Mathematica*, Version 5.2. Champaign, IL: Wolfram Research, Inc.
