# Supplementary material for: Retention Time Variability as a Mechanism for Animal Mediated Long-Distance Dispersal
Source: PubMed Central journal article supplement (PMC3237446; doi:10.1371/journal.pone.0028447), 2011-12-14
Supplement: pone.0028447.s005.pdf [file pone.0028447.s005.pdf]

### Text S5: Correlated random walks in one dimension

Suppose animals perform correlated random walks in one dimension (*i.e.*,  $\Omega = \mathbf{R}$ ) and let  $P_m(x, t)$  be the probability density of an animal being at location  $x \in \Omega$  at time  $t \geq 0$  (we restrict our attention to one dimension for analytical tractability). The initial value problem that determines the evolution of  $P_m$  is given by a telegraph equation [1]:

$$\frac{\partial^2 P_m}{\partial t^2} + \frac{2}{\tau} \frac{\partial P_m}{\partial t} = u^2 \frac{\partial^2 P_m}{\partial x^2}, \quad P_m(x, 0) = \delta(x) \quad \text{and} \quad \frac{\partial P_m}{\partial t}(x, 0) = 0 \quad (1)$$

Here,  $\tau$  is the characteristic time an animal moves before changing directions and  $u$  is its speed. As correlation time ( $\tau$ ) approaches zero, Eq (1) reduces to a diffusion equation in which  $D$  equals the limit of  $\frac{1}{2}u^2\tau$  as  $\tau \rightarrow 0$  and  $u \rightarrow \infty$ . The solution of (1) is [2]:

$$P_m(x, t) = \begin{cases} e^{-\frac{t}{\tau}} \left\{ \delta(x - ut) + \delta(x + ut) + \frac{1}{2u\tau} [I_0(z) + \frac{t}{\tau z} I_1(z)] \right\}, & |x| < ut \\ 0, & |x| > ut \end{cases}$$

where  $z = \frac{1}{\tau} \sqrt{t^2 - \frac{x^2}{u^2}}$  and  $I_0$  and  $I_1$  are the modified Bessel functions of the first kind (there is no known closed form solution to the telegraph equation in two dimensions). Below, we compute the summary statistics of  $P_s$ .

**Mean of  $P_s$ :** Multiply Eq (1) by  $x$  and integrate over  $\Omega$  to get

$$\mu_m''(t) + \frac{2}{\tau} \mu_m'(t) = 0, \quad \mu_m(0) = \mu_m'(0) = 0$$

Here, we have used the fact that  $P_m$  and  $\partial P_m / \partial x$  both approach zero as  $x \rightarrow \pm\infty$ . It follows from the uniqueness of solutions to differential equations that  $\mu_m = 0$ , and hence from Eq (1) of Text S1 that  $\mu_s = 0$ .

**Scale of  $P_s$ :** To determine  $\sigma_s^2$  we first determine  $\mu_m^2(t)$  (the second moment of  $P_m$ , not the square of its first moment). Repeating the same procedure as above but multiplying Eq (1) by  $x^2$  instead of  $x$  yields

$$(\mu_m^2)''(t) + \frac{2}{\tau} (\mu_m^2)'(t) = 2u^2, \quad \mu_m^{12}(0) = (\mu_m^2)'(0) = 0$$

whose solution is

$$\mu_m^2(t) = \frac{u^2 \tau^2}{2} \left( -1 + \frac{2t}{\tau} + e^{-\frac{2t}{\tau}} \right) \quad (2)$$

Straightforward calculations involving Eqs (1) and (4) of Text S1, (2), and (3\*) lead to

$$\sigma_s^2 = \mu_s^2 = \int_0^\infty \mu_m^2(t) P_r(t) dt = \frac{u^2 \tau^2}{2} \left( -1 + \frac{2ab}{\tau} + \left( 1 + \frac{2b}{\tau} \right)^{-a} \right)$$

where  $a$  and  $b$  are parameters of gamma distributed retention times ( $P_r$ ) of Eq (3\*). In comparing this result with the corresponding one for random motion, and to identify the effects of correlation, it will be convenient to introduce the dimensionless quantities  $\omega = \frac{\mu_r}{\tau} = \frac{ab}{\tau}$  and  $\xi^2 = \frac{\sigma_r^2}{\mu_r^2} = \frac{1}{a}$ . In so doing, we fix  $D$  to be a constant and choose  $u$  and  $\tau$  such that  $\frac{1}{2}u^2\tau = D$ . With these substitutions,

$$\sigma_s^2(D\tau, \omega, \xi^2) = D\tau \left( -1 + 2\omega + (1 + 2\omega\xi^2)^{-1/\xi^2} \right) \quad (3)$$

**Shape of  $P_s$ :** To determine  $\kappa_s$  we first determine  $\mu_m^4(t)$  (the fourth moment of  $P_m$ ). Multiplying Eq (1) by  $x^4$  and then integrating over  $\Omega$  produces

$$(\mu_m^4)''(t) + \frac{2}{\tau}(\mu_m^4)'(t) = 12u^2\mu_m^2, \quad \mu_m^4(0) = (\mu_m^4)'(0) = 0$$

The solution of this differential equation is

$$\mu_m^4(t) = \frac{3u^4\tau^4}{2} \left( 3 + \frac{2t}{\tau} \left( \frac{t}{\tau} - 2 \right) - \left( 3 + \frac{2t}{\tau} \right) e^{-\frac{2t}{\tau}} \right) \quad (4)$$

Straightforward calculations involving Eq (4) of Text S1, (4), and (3\*) lead to

$$\mu_s^4 = \frac{3u^4\tau^4}{2} \left( 3 - \frac{4ab}{\tau} + \frac{2a(a+1)b^2}{\tau^2} - \left( 3 + \frac{2(a+3)b}{\tau} \right) \left( 1 + \frac{2b}{\tau} \right)^{-1-a} \right)$$

Utilizing the dimensionless parameters,

$$\mu_s^4 = 6(D\tau)^2 \left( 3 - 4\omega + 2\omega^2(1 + \xi^2) - (3 + 2\omega(1 + 3\xi^2)) (1 + 2\omega\xi^2)^{-1-\frac{1}{\xi^2}} \right) \quad (5)$$

Eq (1) of Text S1, (3), and (5) and the relation  $\mu_s = 0$  together imply that

$$\kappa_s(\omega, \xi^2) = \frac{\mu_s^4}{\sigma_s^4} - 3 = 6 \left\{ \frac{3 - 4\omega + 2\omega^2(1 + \xi^2) - (3 + 2\omega(1 + 3\xi^2)) (1 + 2\omega\xi^2)^{-1-\frac{1}{\xi^2}}}{(-1 + 2\omega + (1 + 2\omega\xi^2)^{-1/\xi^2})^2} \right\} - 3$$

Although the shape ( $\kappa_s$ ) of  $P_s$  does not depend directly on  $D = \frac{1}{2}u^2\tau$  (as was also the case with random motion), it does depend on correlation time  $\tau$  via  $\omega$ . See the panel in Fig S(1)). Also note that, unlike in previous random walk models where summary statistics of  $P_s$  were general with respect to  $P_r$ , the expressions for the scale and shape above depend on explicit form of  $P_r$  to be a gamma distribution.

**Form of  $P_s$ :** Although we are unable to obtain a closed form for the seed dispersal kernel ( $P_s$ ), we can find it using numerical integration. See Fig S(2).

## References

- [1] Othmer HG, Dunbar SR, Alt W (1988) Models of dispersal in biological systems. J Math Biol 26: 263–298.
- [2] Morse P, Feshbach H, Hill E (1954) In: Methods of theoretical physics, volume 22. p. 410.

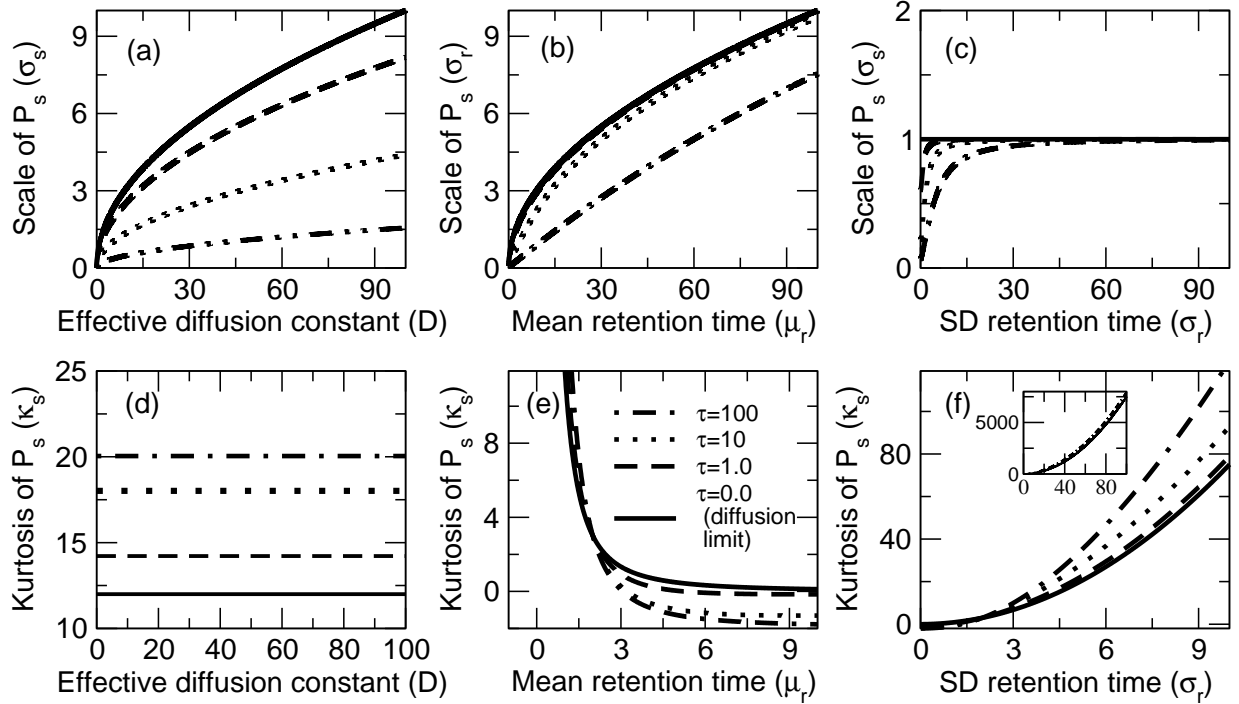

**Figure S1:** Scale ( $\sigma_s$ ) and kurtosis ( $\kappa_s$ ) of the seed dispersal kernel for animals that move according to correlated random walks (CRW). Scale as a function of: (a) The effective diffusion constant,  $D = \frac{1}{2}u^2\tau$ ; Parameters:  $\mu_r = 0.5$  and  $\sigma_r = 1.0$ . (b) Mean seed retention time,  $\mu_r$ ; Parameters:  $D = 0.5$  and  $\sigma_r = 1.0$ . (c) Standard deviation (SD) of seed retention time,  $\sigma_r$ ; Parameters:  $D = 1.0$  and  $\mu_r = 1.0$ . Excess kurtosis as a function of: (d) The effective diffusion constant,  $D$ ; Parameters:  $\mu_r = 1.0$  and  $\sigma_r = 2.0$ . (e) Mean seed retention time,  $\mu_r$ ; Parameters:  $D = 1.0$  and  $\sigma_r = 2.0$ . (f) Standard deviation (SD) of seed retention time,  $\sigma_r$ ; Parameters:  $D = 1.0$  and  $\mu_r = 2.0$ . Inset in (f) shows that the trend of  $\kappa_s$  over large scales of  $\sigma_r$  is qualitatively unaffected by the choice of the correlation time scale ( $\tau$ ).

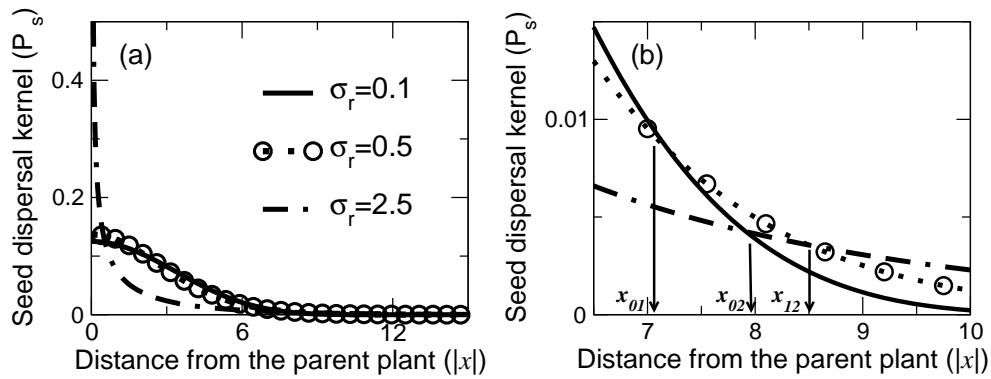

**Figure S2:** Correlated random walk in one dimension. (a) The seed dispersal kernel as a function of distance from the source tree ( $|x|$ ) and standard deviation in seed retention time ( $\sigma_r$ ). (b) The seed dispersal kernel at larger distances. The larger the  $\sigma_r$ , the more frequent the LDD events. Note that  $x_{01} < x_{02} < x_{12}$  ( $x_{01} \approx 7.1, x_{02} \approx 8.0, x_{12} \approx 8.5$ ). Parameters:  $\tau = 1.0$  and  $\mu_r = 10.0$ .
