# Supplementary material for: Retention Time Variability as a Mechanism for Animal Mediated Long-Distance Dispersal
Source: PubMed Central journal article supplement (PMC3237446; doi:10.1371/journal.pone.0028447), 2011-12-14
Supplement: pone.0028447.s007.pdf [file pone.0028447.s007.pdf]

### Text S7: Power-law movement in two dimensions

Suppose now that animals move randomly in two dimensions but that individuals vary in their diffusion rate. In particular, we assume that their diffusivity  $D$  follows a Gamma distribution (with shape  $\alpha$  and scale  $\beta$ ). Then the tail of the movement pattern obeys [1]

$$P_m(x, t) \approx A_0 |x|^{\alpha - \frac{3}{2}} e^{-\frac{|x|}{\beta t}}, \quad |x| \gg 1$$

Here,  $A_0$  is a constant that does not depend on  $x$ . As our interest is in determining whether a power-law displacement pattern can produce LDD of seeds in the absence of seed retention time variability ( $\sigma_r^2 = 0$ ), we consider the special case in which  $P_r(t) = \delta(t - T)$ . Under this condition, Eq (1\*) implies that

$$P_s(x) \approx A_0 |x|^{\alpha - \frac{3}{2}} e^{-\frac{|x|}{\beta T}}, \quad |x| \gg 1$$

which is indeed power-law seed dispersal kernel.

## References

- [1] Petrovskii S, Morozov A (2009) Dispersal in a Statistically Structured Population: Fat Tails Revisited. *Am Nat* 173: 278–289.
