# Supplementary material for: Retention Time Variability as a Mechanism for Animal Mediated Long-Distance Dispersal
Source: PubMed Central journal article supplement (PMC3237446; doi:10.1371/journal.pone.0028447), 2011-12-14
Supplement: pone.0028447.s010.pdf [file pone.0028447.s010.pdf]

Figure S1: Predicted kurtosis from empirical data sets

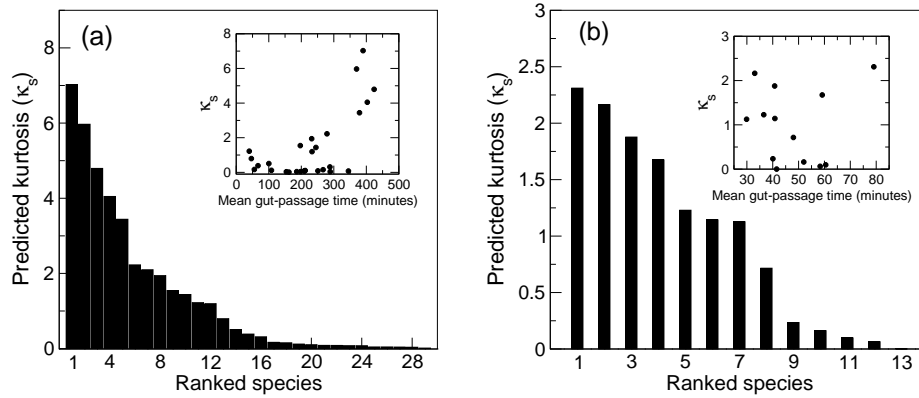

**Figure S1:** Ranked predicted kurtosis ( $\kappa_s = 6\sigma_r^2/\mu_r^2$ ) of the seed dispersal kernel from real data sets. (a) The gut-passage data for the plant-frugivore interactions in Table 2. (b) The gut-passage data for the Mediterranean avian seed dispersers in Table 3. Insets show kurtosis as a function of mean gut-passage time; this shows that similar mean retention times can generate seed dispersal curves with different degrees of kurtosis and therefore the variability in the gut-passage time scaled by its mean is needed to make reliable predictions.
