# Supplementary material for: Retention Time Variability as a Mechanism for Animal Mediated Long-Distance Dispersal
Source: PLoS One. 2011 Dec 14;6(12):e28447. doi: 10.1371/journal.pone.0028447 (PMC3237446; doi:10.1371/journal.pone.0028447)
Supplement: Text S9 — Absolute measure of long-distance dispersal. (PDF) [file pone.0028447.s009.pdf]

### Text S9: Absolute measure of long distance dispersal

Based on [1], we define an absolute measure of long distance dispersal to be the proportion of seeds falling beyond a threshold distance. Mathematically we can write this as:

$$f_{ldd}(d_c, \sigma_r) = \int_{d_c}^{\infty} P_s(|x|; \sigma_r) dx \quad (1)$$

$$= P_s(|x| > d_c) = 1 - P_s(|x| \leq d_c) \quad (2)$$

where  $f_{ldd}$  is the absolute measure and  $d_c$  is the threshold dispersal distance. Although the seed dispersal kernel  $P_s$ , and consequently  $f_{ldd}$ , depends on many other animal behavior characteristics such as diffusion rate, mean seed retention time, etc, we focus only on the impact of variations (or SD) in the retention time and threshold dispersal distance ( $d_c$ ).

Here, we describe the procedure we followed to obtain Fig 3\*c (of the main text). We assume that animals move diffusively in a two dimensional environment. Next, we substitute Eq 2 of Text S3 for  $P_s$  into Eq (2) and use Mathematica to evaluate the integration numerically [2]. For a fixed value of  $d_c$ , we determine  $f_{ldd}$  as a function of  $\sigma_r$  (see Fig S1) and normalize it by the maximum value of  $f_{ldd}$ . We denote the normalized value of absolute LDD by  $\hat{f}_{ldd}$ . We repeat this procedure for many values of the threshold distance  $d_c$ .

For each value of the threshold dispersal distance  $d_c$ , we identify the value of  $\sigma_r^*$  that maximizes absolute LDD events,  $f_{ldd}$  (or where  $\hat{f}_{ldd} = 1$ ). We join the values of  $\sigma_r^*$  to obtain a pitchfork like bifurcation pattern as a function of the threshold distance in Fig 3\* (C) of the main text.

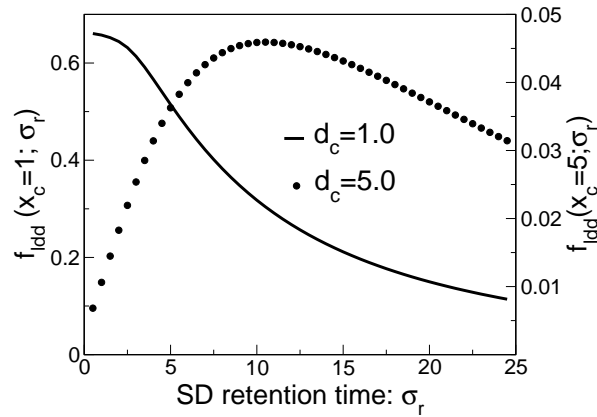

**Figure S 1:** Absolute measure of long distance dispersal. Parameters:  $D = 1.0$  and  $\mu_r = 1.0$ .

## References

- [1] Nathan R, Schurr FM, Spiegel O, Steinitz O, Trakhtenbrot A, et al. (2008) Mechanisms of long-distance seed dispersal. *Trends Ecol Evol* 23: 638–647.
- [2] Wolfram Research Inc (2004) Mathematica, Version 5.2. Champaign, IL: Wolfram Research, Inc.
